# Supplementary material
Source: Research Square preprint supplement (doi:10.21203/rs.3.rs-8701971/v1)
Supplement: Supplementary file 1 [file 3467b8e36b929ae008698146.pdf]

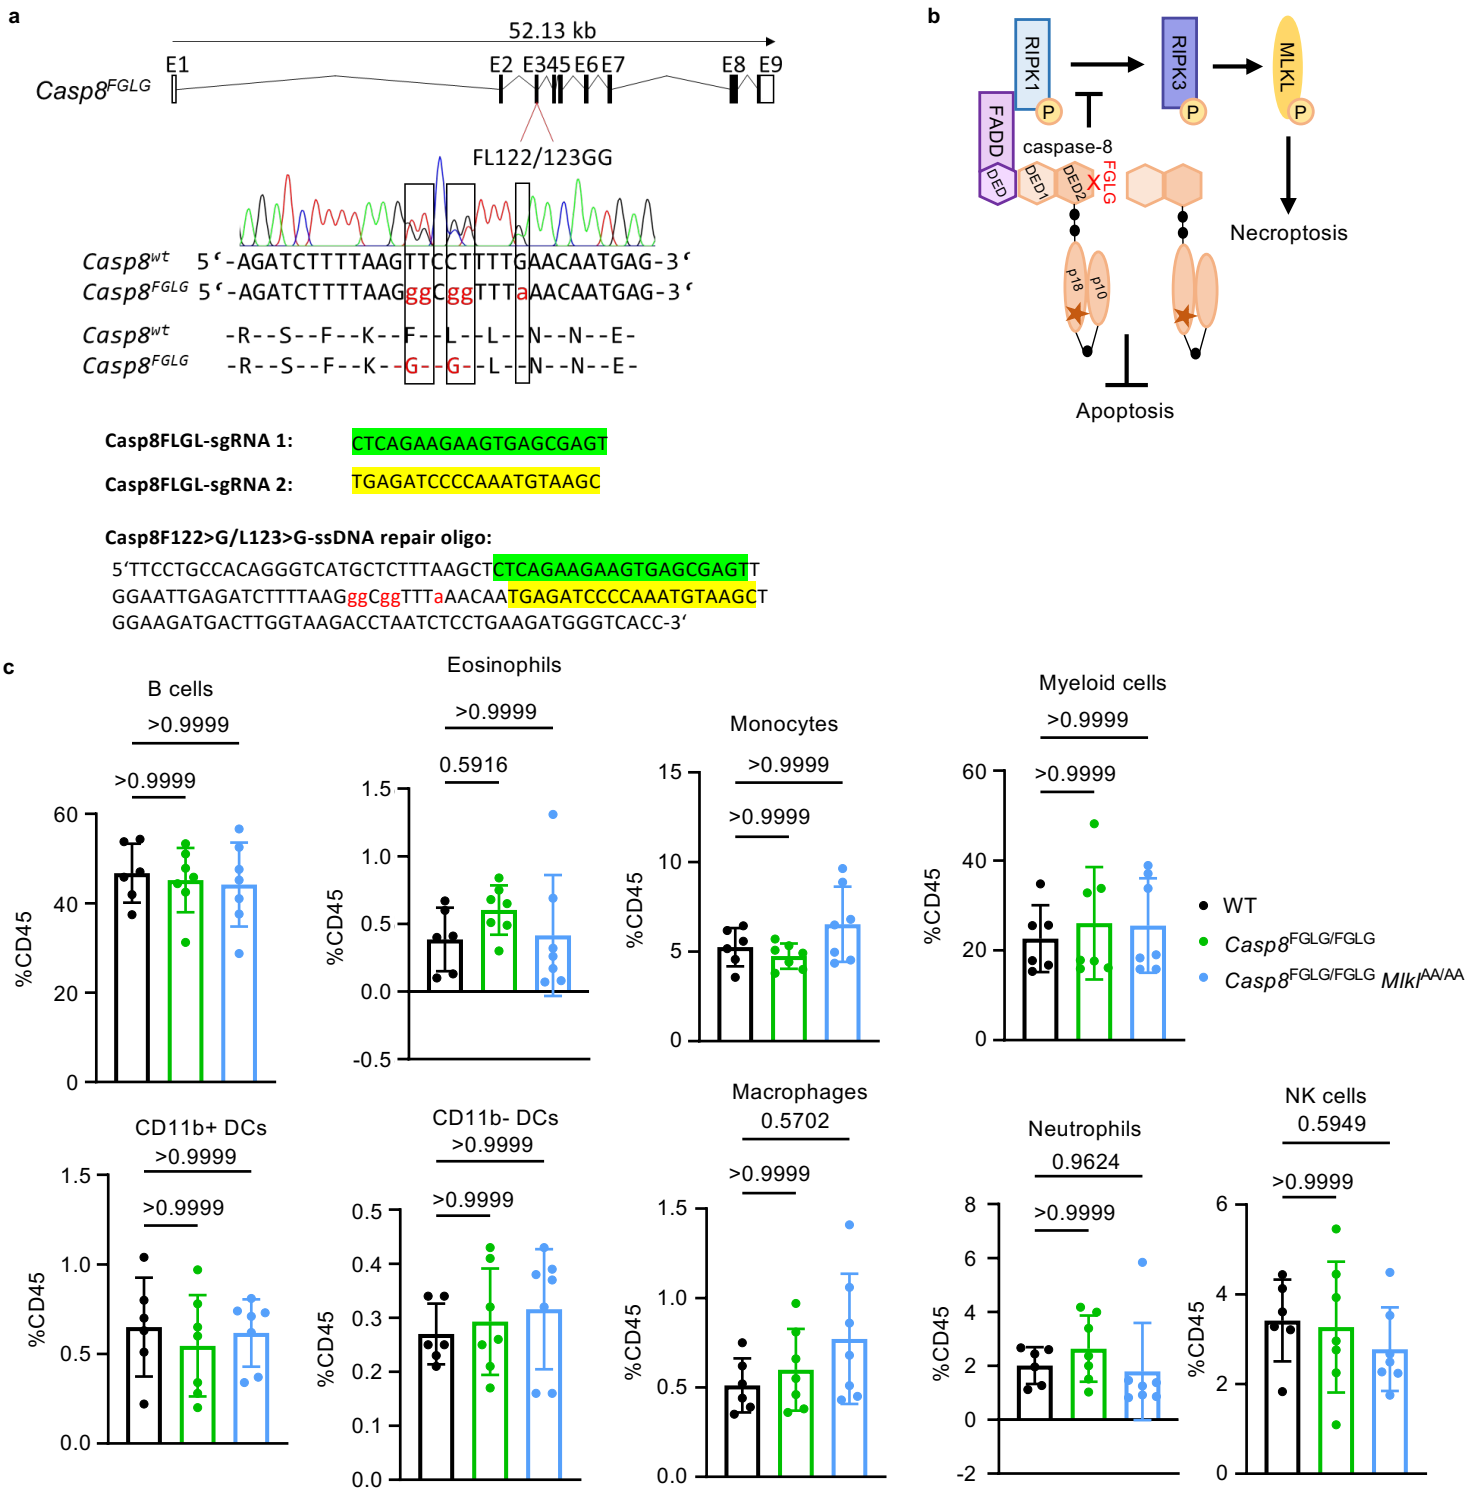

**Supplementary Figure 1: Generation and characterization of *Casp8*<sup>FGLG</sup> mice.** (a) Schematic depiction of the *Casp8*<sup>FGLG</sup> knock-in mutation, sequencing results from the heterozygous founder and sgRNA constructs and repair template used for CRISPR/Cas9 mediated knock-in. (b) Graphic representation of the predicted function of the caspase-8(FGLG) knock-in mutation. (c) FACS analysis using spleen from adult mice of the indicated genotypes. Data is pooled from two independent experiments using panel A (SM 1a). Dots represent individual mice, bars represent the mean  $\pm$  SD. Statistical significance was determined by Kruskal-Wallis multiple comparison analysis to WT controls using Dunn's correction.

**a Panel A**

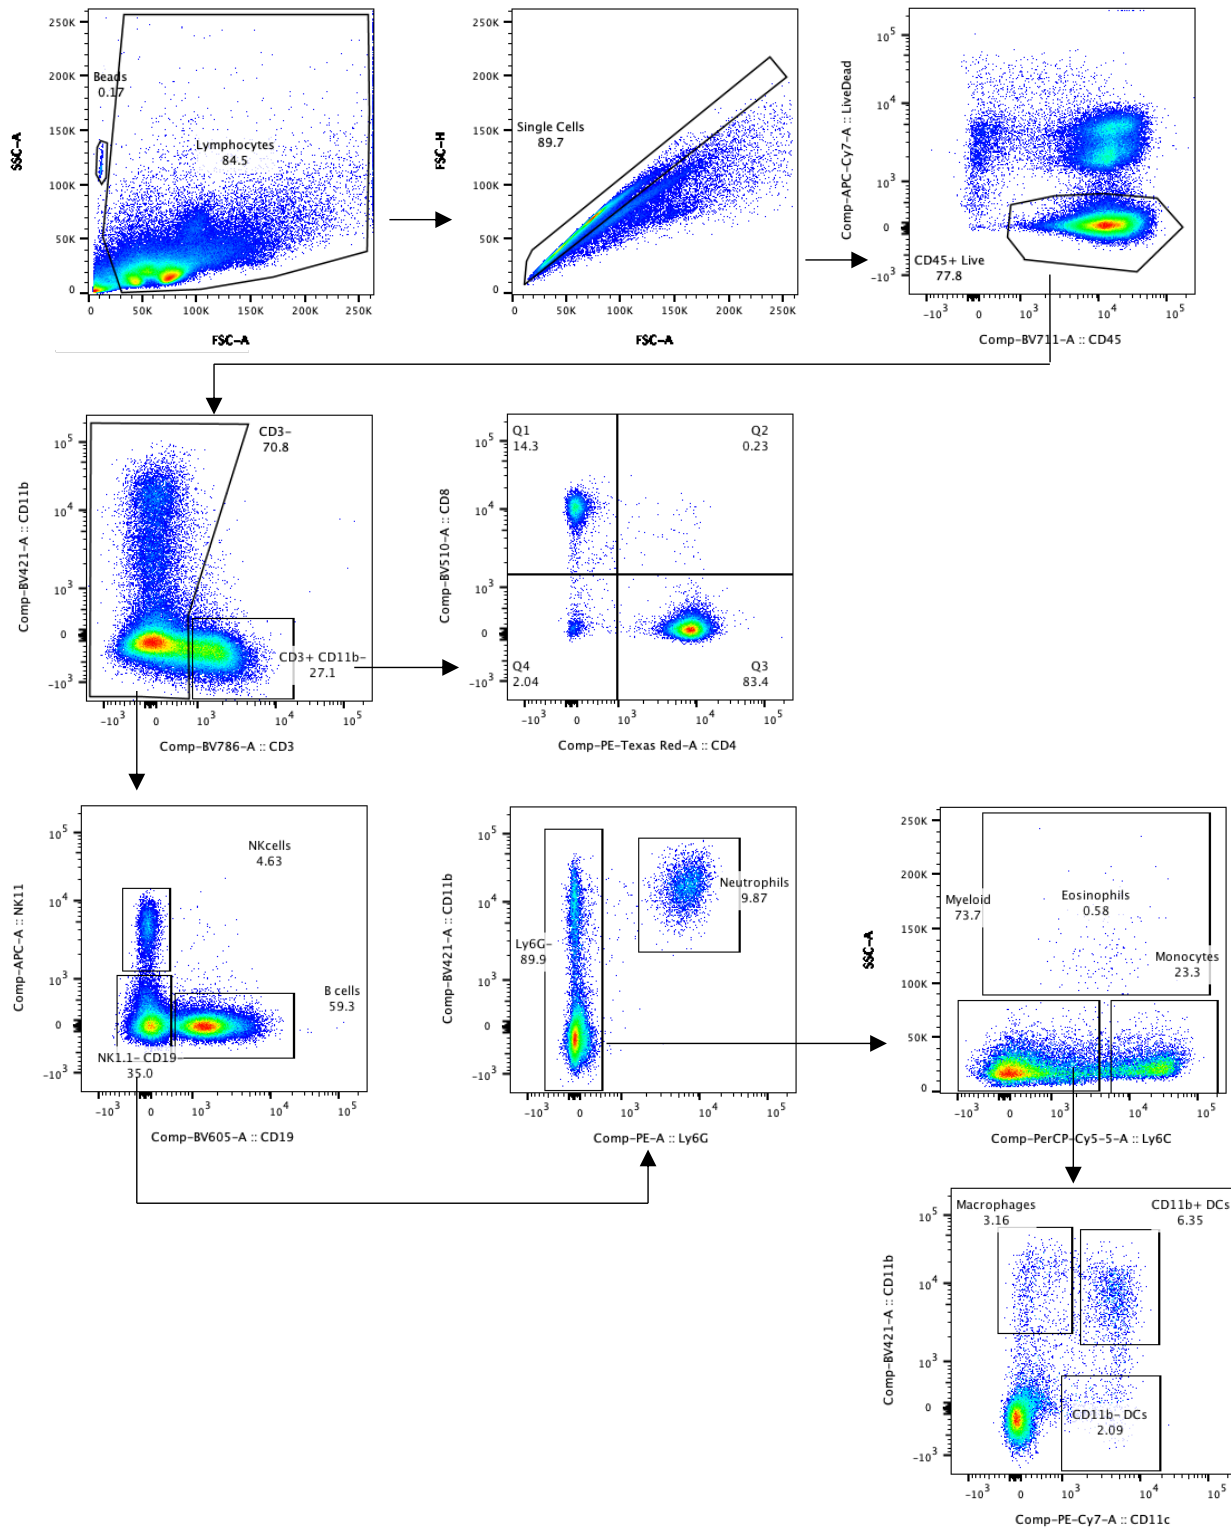

**Supplementary Figure 2. FACS panel gating strategies.** (a) Panel A showing a representative example of the gating strategy used to determine each cell population in ED Figure 1. Names of each population are labeled as cited in the text. Details of antibodies used are listed in the methods section.
