# Supplementary material
Source: Research Square preprint supplement (doi:10.21203/rs.3.rs-8701971/v1)

Fig. 1g

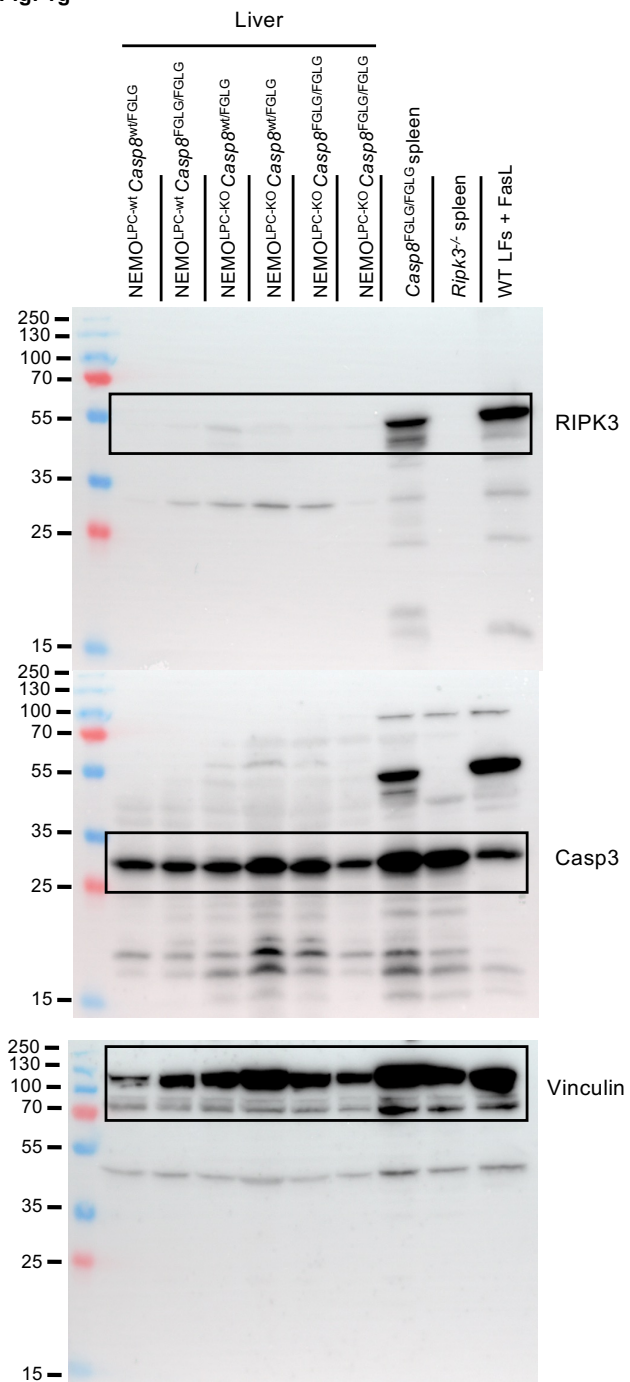

**Fig. 2a**

BMDMs WT *Casp8<sup>FGLG/FGLG</sup>*

TAK1i - + - + 4h

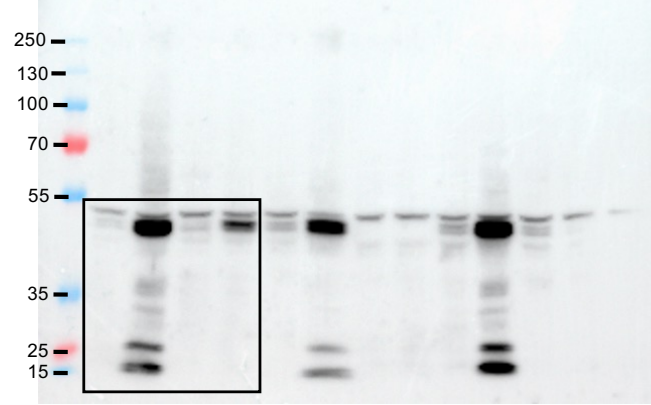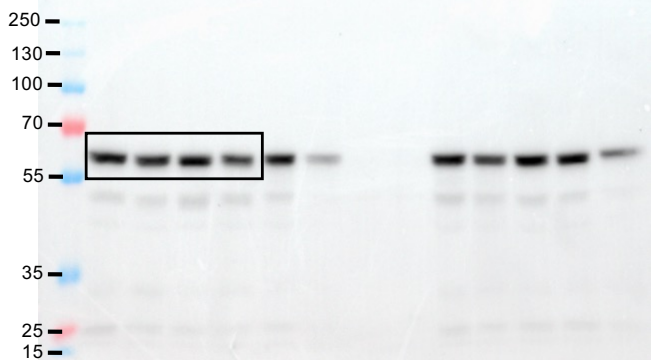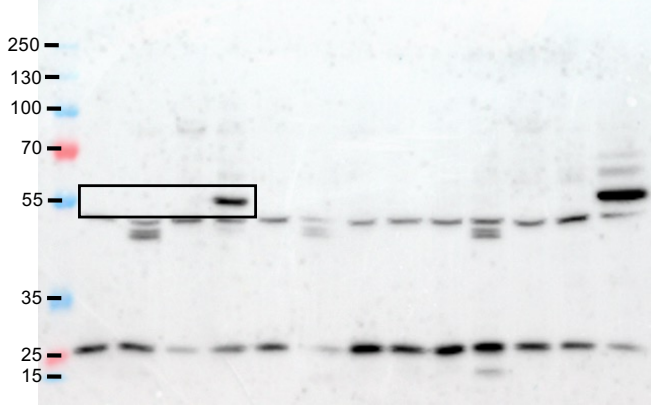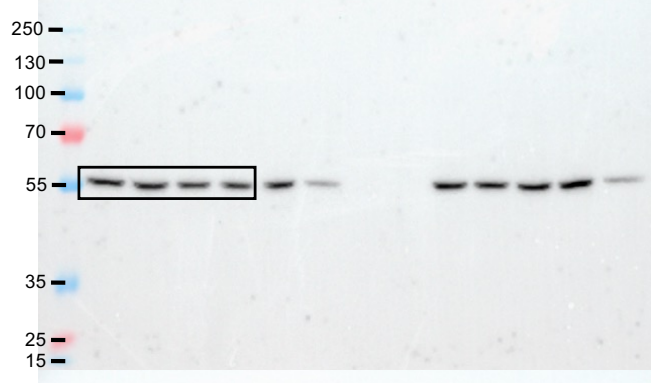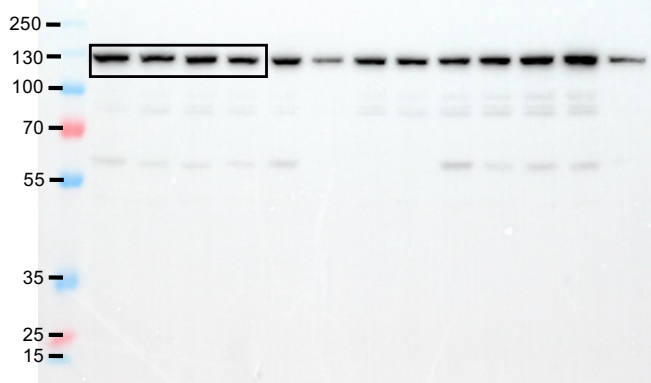

BMDMs WT *Casp8<sup>FGLG/FGLG</sup>*

TAK1i - + - + 4h

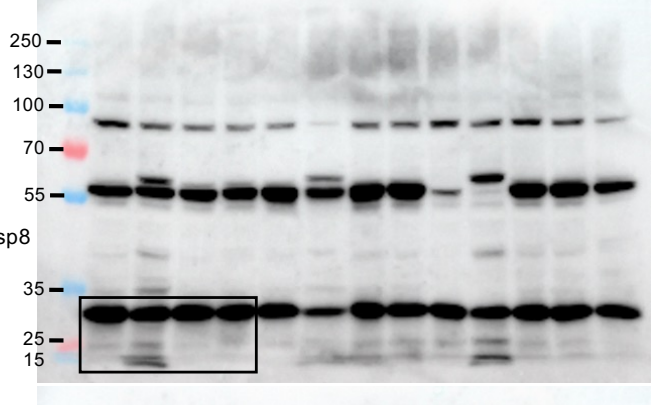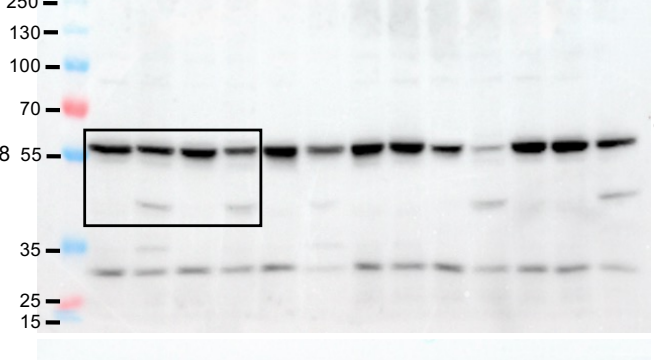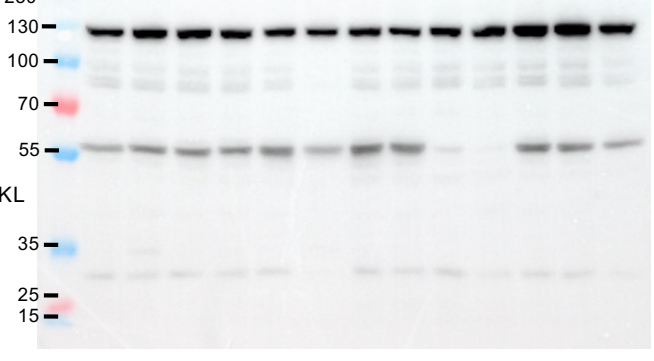

Casp3  
cl.Casp3

cFLIP

Vinculin

cl.Casp8

Casp8

pMLKL

MLKL

Vinculin

**Fig. 3b**

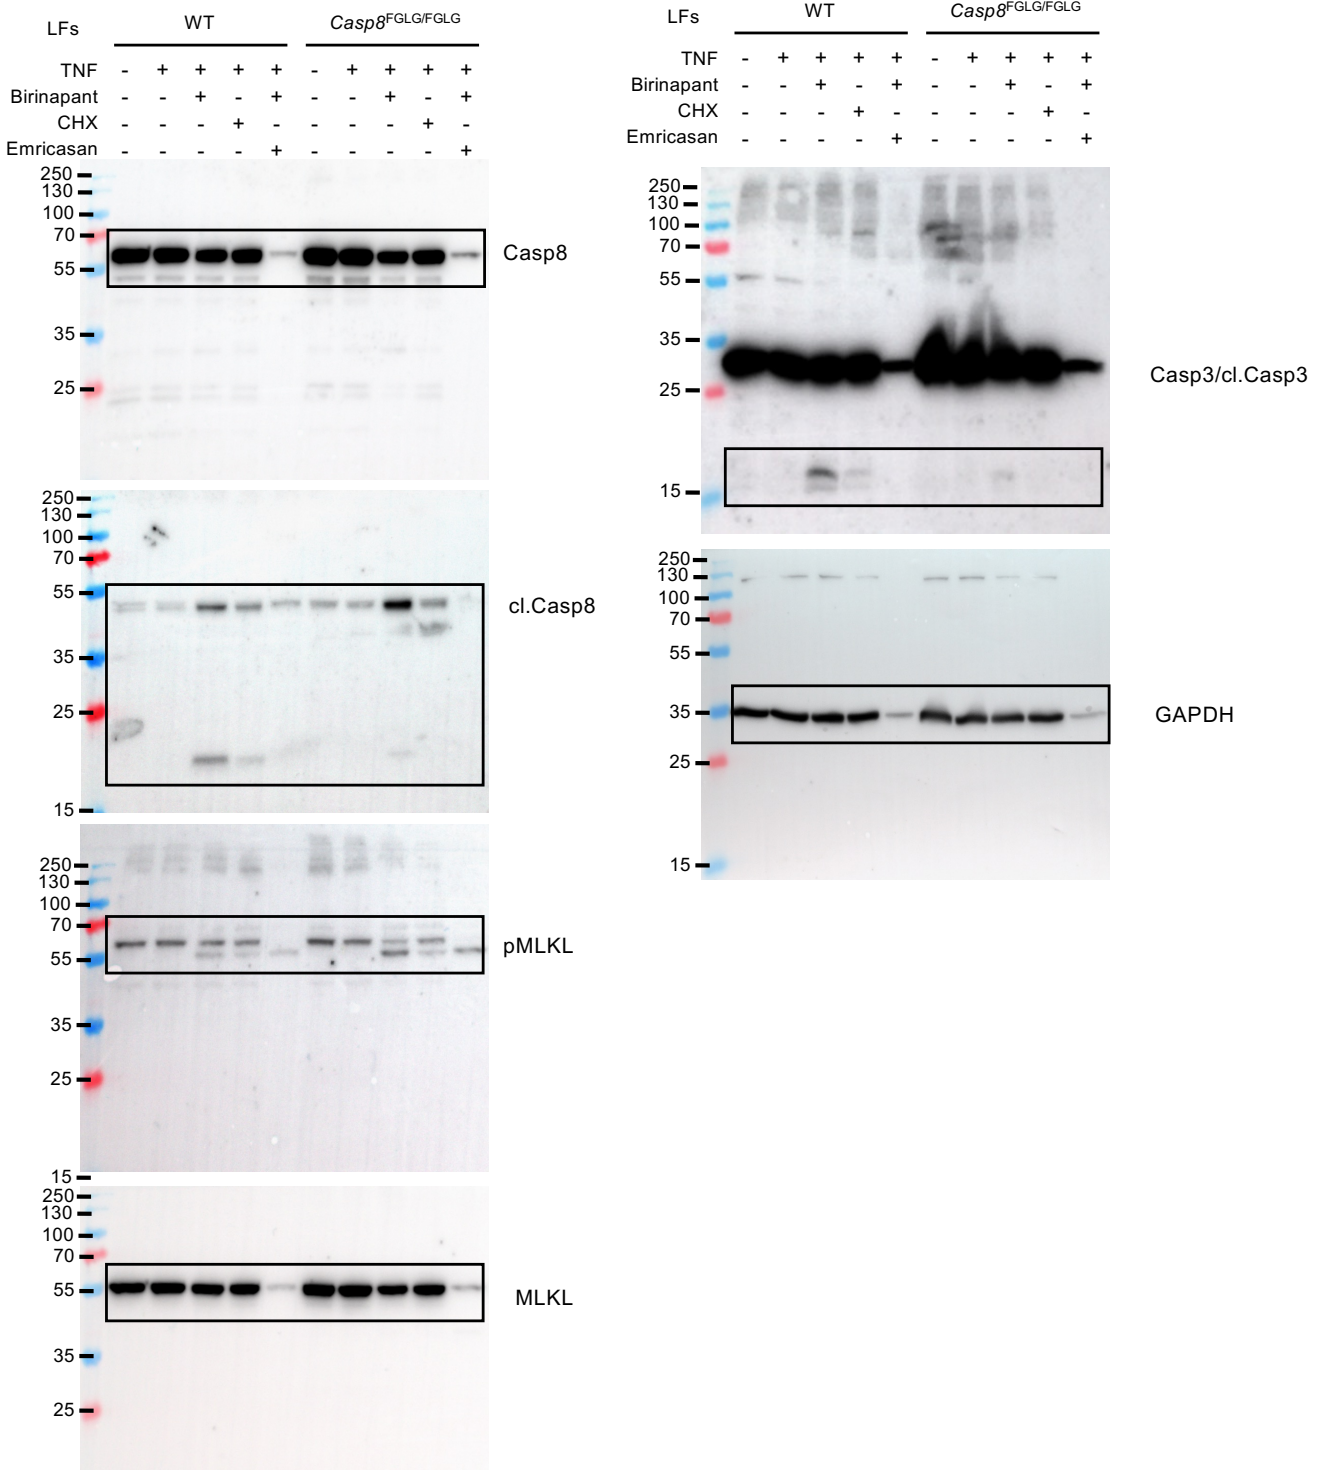

Fig. 3d

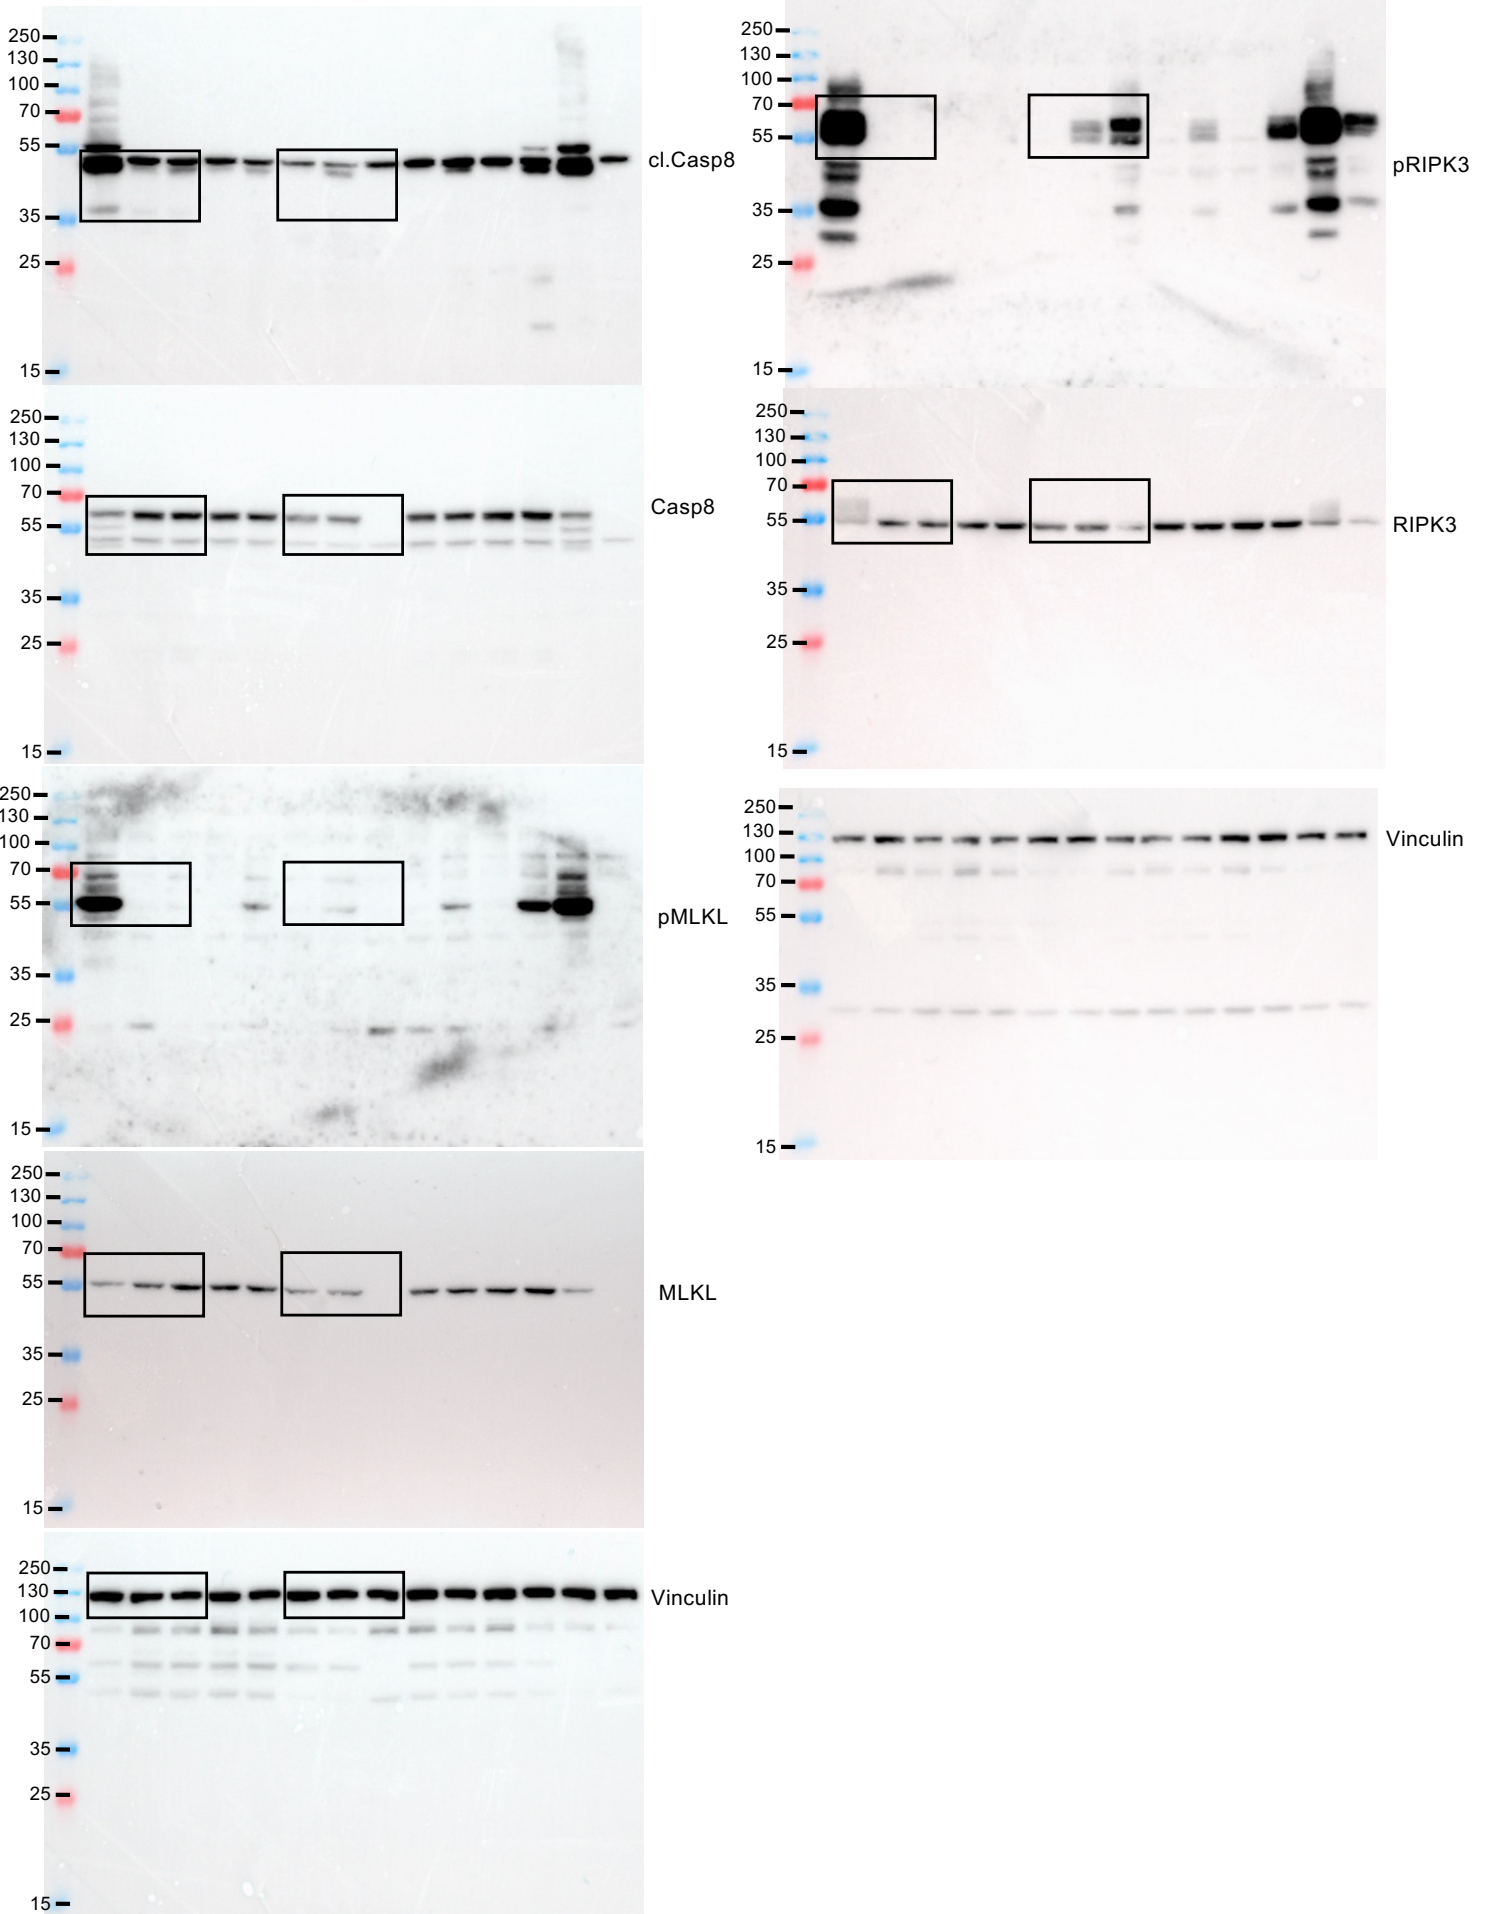

Fig. 4b

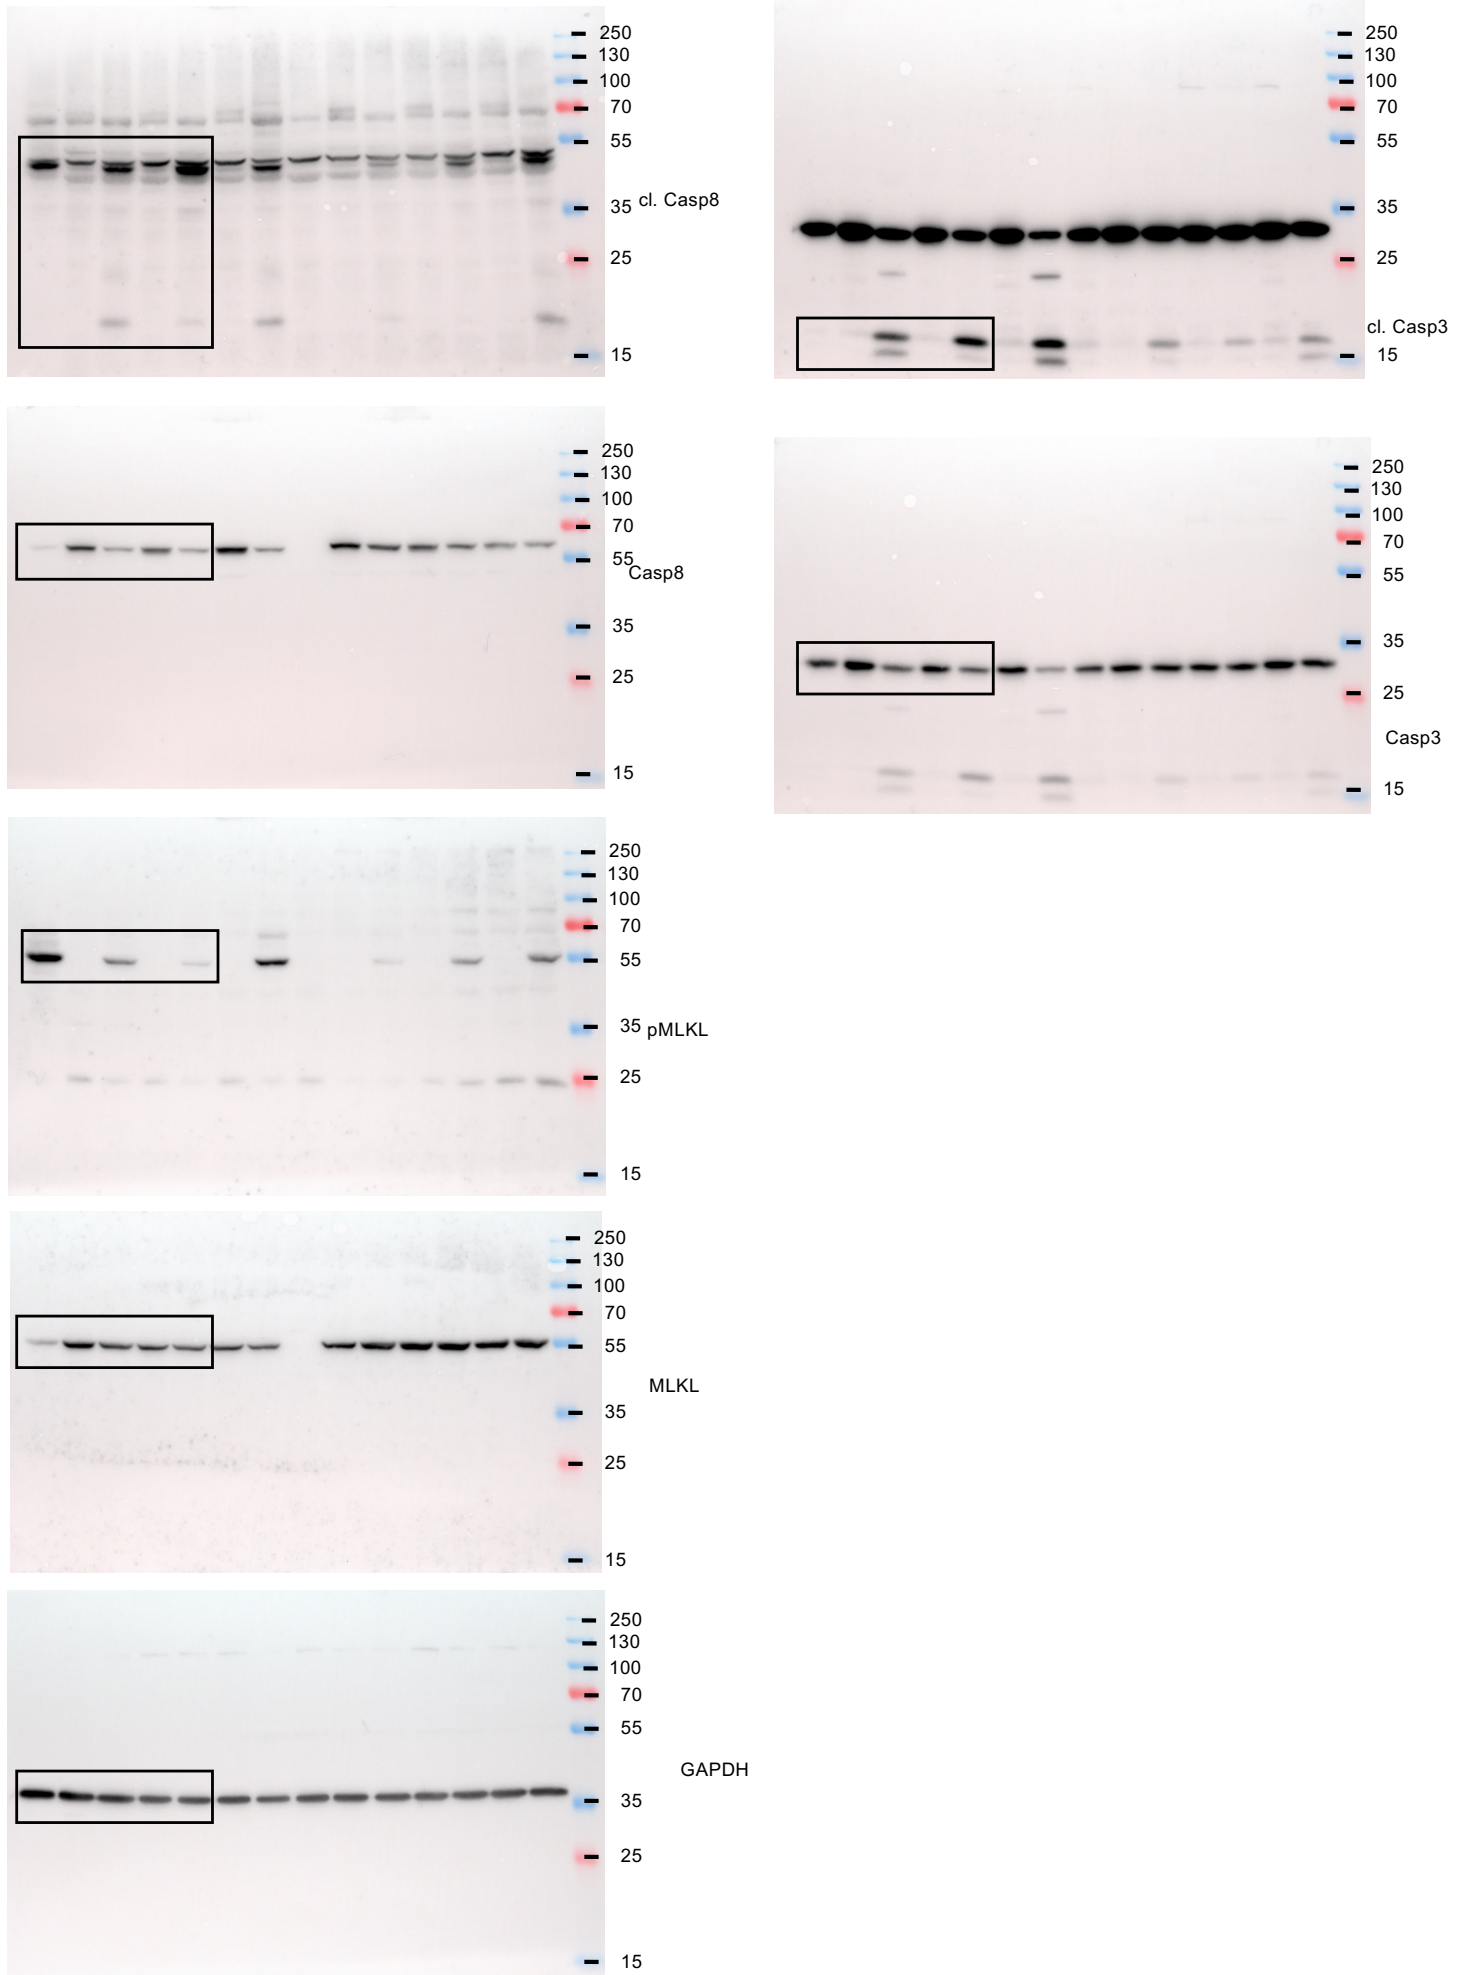

Supplement: Supplementary file 2 [file b3b69c468a630944d5cfd693.pdf]
